# Supplementary material for: Functional diversity among cardiolipin binding sites on the mitochondrial ADP/ATP carrier
Source: PubMed Central journal article supplement (PMC11251061; doi:10.1038/s44318-024-00132-2), 2024-06-05
Supplement: 44318_2024_132_MOESM11_ESM.pdf [file 44318_2024_132_MOESM11_ESM.pdf]

## Expanded View Figures

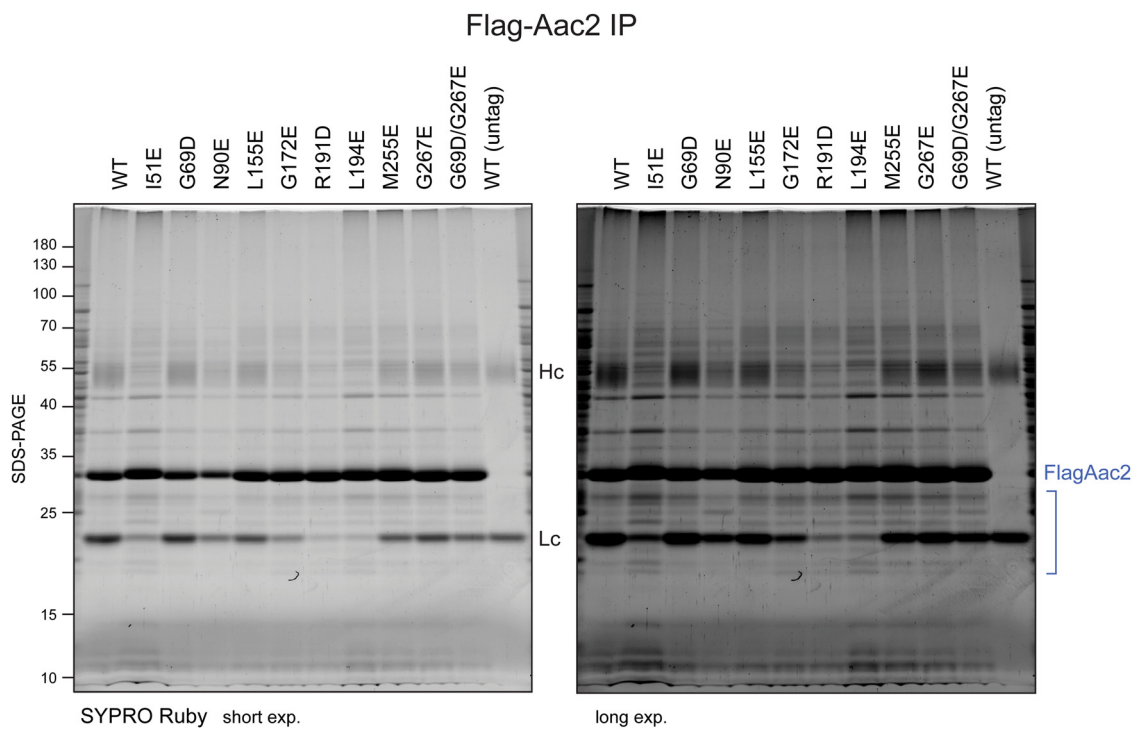

**Figure EV1. Aac2 CL-binding mutants do not engage in aberrant protein interactions.**

Isolated mitochondria were solubilized with 1.5% digitonin and subjected to FLAG immunoprecipitation. Co-purified extracts were resolved by 10–16% SDS-PAGE and resolved proteins detected by SYPRO Ruby staining.

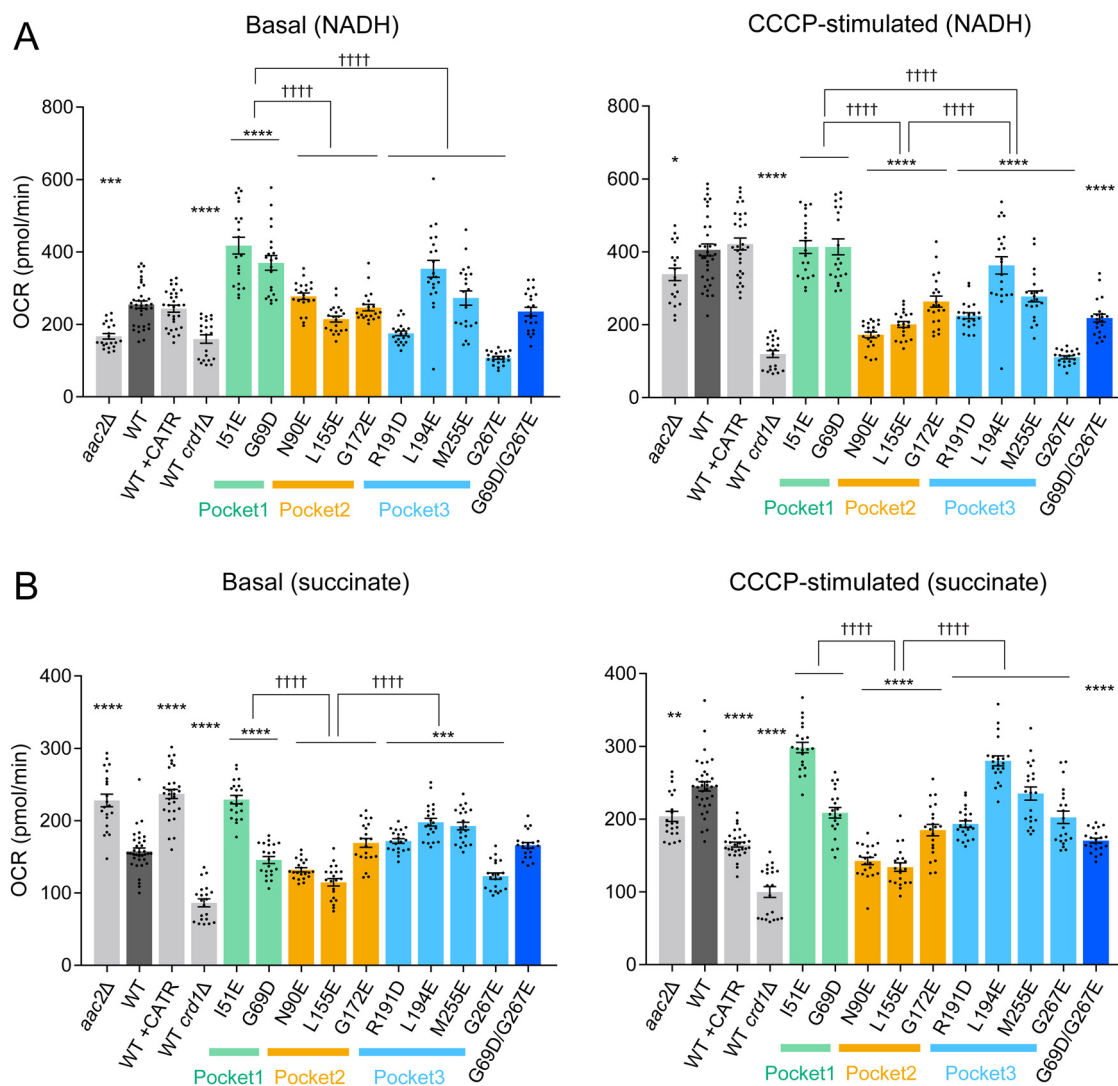

**Figure EV2. Mitochondrial respiration of Aac2 CL-binding mutants.**

Related to Fig. 4D-F, basal and CCCP-stimulated respirations of WT and mutant mitochondria in the presence of NADH (A) and succinate (B) were plotted as oxygen consumption rate (OCR) ( $n = 21-35$ , 3-5 biological replicates with 5-7 technical replicates). Mean with SEM. Significant differences obtained by two-way ANOVA followed by Tukey's multiple comparisons test are shown as \* for comparison with WT and † for comparison between pockets; \* $p < 0.05$ , \*\* $p < 0.01$ , \*\*\* $p < 0.001$ , \*\*\*\* $p < 0.0001$ .

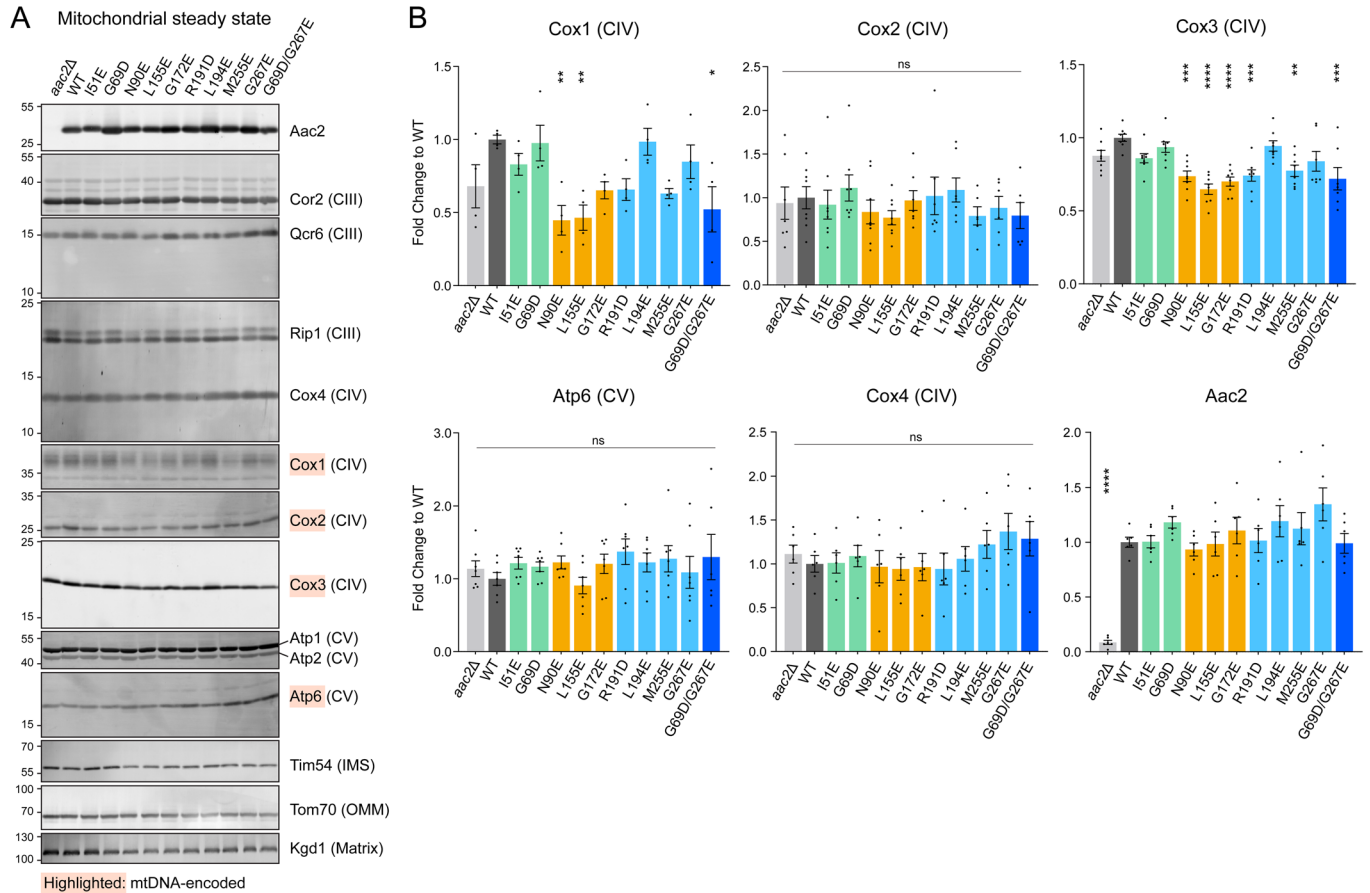

**Figure EV3. The expression of respiratory complex subunits encoded in mitochondrial DNA is attenuated in Aac2 CL-binding mutants.**

(A) Mitochondrial extracts were resolved by SDS-PAGE and immunoblotted for indicated proteins, including subunits of respiratory complexes III, IV, and V. (B) The expression of indicated respiratory complex subunits was quantified. Mean with SEM. Statistical differences were analyzed by one-way ANOVA followed by Dunnett's multiple comparison test; \* $p < 0.05$ , \*\* $p < 0.01$ , \*\*\* $p < 0.001$ , \*\*\*\* $p < 0.0001$  (vs. WT). Representative images from the replicates ( $n = 4-8$ , biological replicates) are shown.

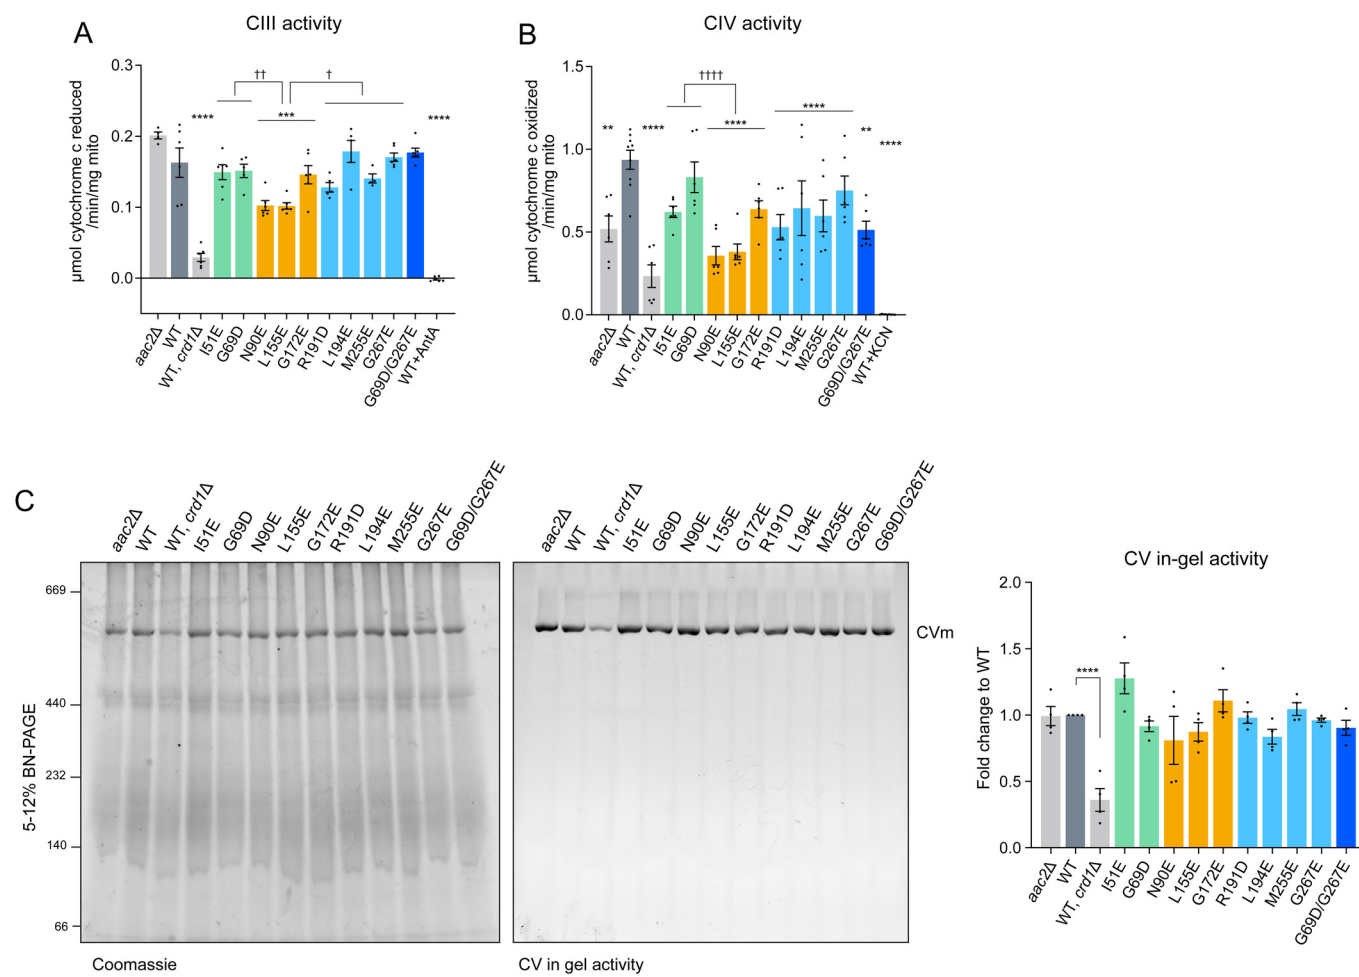

**Figure EV4. Activities of respiratory complexes III, IV, and V of CL-binding mutants.**

(A) Complex III activity in 0.5% (w/v) DDM-solubilized mitochondria ( $n = 4-6$ , biological replicates). (B) Complex IV activity in 0.5% (w/v) DDM-solubilized mitochondria ( $n = 6-9$ , biological replicates). (C) Complex V in-gel activity assay. Mitochondria were solubilized in 1% (w/v) DDM, resolved by 5-12% blue native-PAGE, and incubated with the substrate ( $n = 5$ , biological replicates). Mean with SEM. Significant differences obtained by two-way ANOVA followed by Tukey's multiple comparisons test are shown as \* for comparison with WT and † for comparison between pockets; \* $p < 0.05$ , \*\* $p < 0.01$ , \*\*\* $p < 0.001$ , \*\*\*\* $p < 0.0001$ .

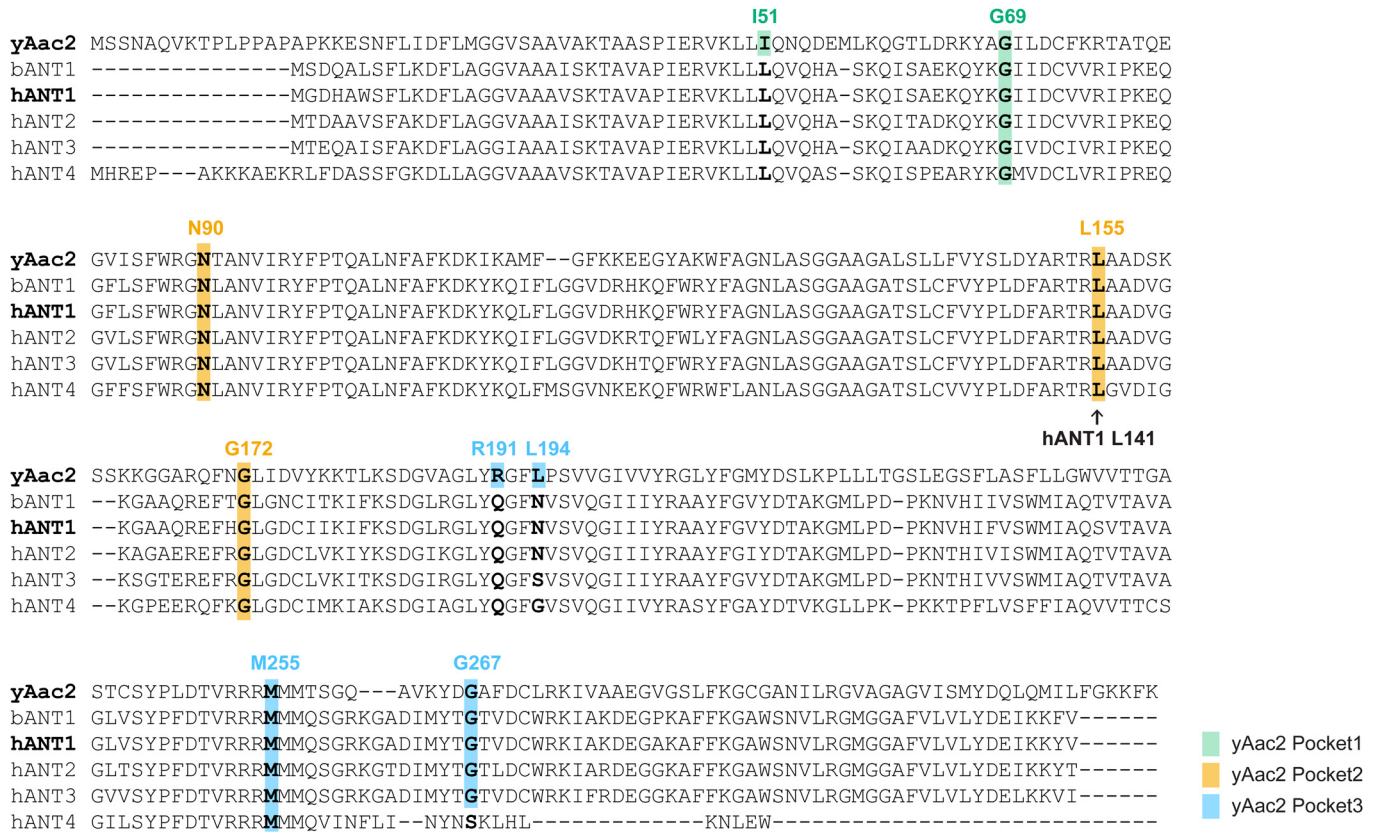

**Figure EV5. CL-binding sites are conserved across species.**

Amino acid sequence alignment of yeast Aac2, bovine ANT1, and human ANT isoforms. The residues designed for the Aac2 CL-binding mutants are highlighted as indicated.
